# Supplementary material
Source: HighWire-hosted journal article supplement (https://rmdopen.bmj.com/content/3/2/e000491)
Supplement: inline-supplementary-material-5 [file inline-supplementary-material-5.docx]

**SUPPLEMENTARY DATA**

**Supplementary figure legends**

**Supplementary figure S1** Proportions of patients achieving (A) ACR20, (B) ACR50 and (C) ACR70 over time (observed values)
Error bars show SE; reductions in patient numbers over time reflect that some patients have not reached time point.
BID, twice daily; SE, standard error.

**Supplementary figure S2** Proportion of patients achieving (A) DAS28-4(ESR)<2.6, (B) CDAI≤2.8 and (C) HAQ‑DI<0.5
Error bars show SE;reductions in patient numbers over time reflect that some patients have not reached time point.
BID, twice daily; CDAI, Clinical Disease Activity Index; DAS28-4(ESR), Disease Activity Score in 28 joints, erythrocyte sedimentation rate; HAQ-DI, Health Assessment Questionnaire-Disability Index; SE, standard error.

**Supplementary figure S3** Mean change from baseline in laboratory parameters
Error bars show SE; reductions in patient numbers over time reflect that some patients have not reached time point.
BID, twice daily; SE, standard error.

**Supplementary figure S4** Mean change from baseline in HDL, LDL, TC and triglycerides
Error bars show SE; reductions in patient numbers over time reflect that some patients have not reached time point.
BID, twice daily; HDL, high-density lipoprotein; LDL, low-density lipoprotein; SE, standard error; TC, total cholesterol.
